1

2 An averaging model for analysis and interpretations of high-order genetic interactions

3

4

5 Fumiaki Katagiri

6 Department of Plant and Microbial Biology, Microbial and Plant Genomics Institute, University of

7 Minnesota, St. Paul, MN 55108, USA

8

9 katagiri@umn.edu

10 **SUMMARY**

11 While combinatorial genetic data collection from biological systems in which quantitative phenotypes  
12 are controlled by functional and non-functional alleles in each of multiple genes (multi-gene systems) is  
13 becoming common, a standard analysis method for such data has not been established. A common  
14 additive model of the non-functional allele effects contrasted against the functional alleles, based on  
15 ANOVA with interaction, has three issues. First, although it is a long tradition of genetics, modeling the  
16 effect of the non-functional allele (a null mutant allele) contrasted against that of the functional allele  
17 (the wild-type allele) is not suitable for mechanistic understanding of multi-gene systems. Second, an  
18 additive model is highly problematic when the system has more than two genes and a limited  
19 phenotypic range: errors propagate toward higher order interactions. Third, interpretations of higher-  
20 order interactions defined by an additive model are not intuitive. I propose an averaging model, which is  
21 suitable for mechanistic understanding of multi-gene systems. The effect of the functional allele is  
22 contrasted against the effect of the non-functional allele for easier mechanistic interpretations. Errors in  
23 interactions across the orders consistently stay low, which makes the model highly scalable to systems  
24 with many genes. The interactions defined by the averaging model are highly intuitive regardless of the  
25 orders. Yet, it is still a general linear model, so model fitting is easy and accurate using common  
26 statistical tools.

## 27 INTRODUCTION

28 Accumulation of genetic knowledge in many biological systems and technological advances that made  
29 combining multiple genetic loci easier have facilitated combinatorial genetic analysis among multiple  
30 genes, each of which has the functional (“wild-type”) and non-functional (null “mutant”) allele states,  
31 involved in single quantitative traits [1-4], which I here call multi-gene systems. However, conventional  
32 genetics is not well built for analysis and interpretation of high-order genetic interactions among  
33 multiple genes involved in a single quantitative trait. This is because conventional genetics is an  
34 extension of early objectives of analyzing functionally independent and/or qualitative genes. First,  
35 comparing multiple mutant phenotypes to the wild-type phenotype does not allow simple mechanistic  
36 interpretations. The phenotype of a particular genotype should be compared to the phenotype of the  
37 most disrupted mutant state (e.g., a quadruple null mutant in a 4-gene system) for simple mechanistic  
38 interpretations. Second, how to define and interpret genetic interactions among multiple genes is not  
39 definitively integrated. The main topic of this paper concerns this second point. An additive model based  
40 on ANOVA with interaction is a simple implementation for analysis of high-order genetic interactions.  
41 However, such an additive model requires conservation of the distributive law involving addition and  
42 interaction (e.g.,  $(A + B):C = A:C + B:C$ , where “:” indicates the interaction defined in the additive model).  
43 I demonstrate that this requirement is not generally satisfied in high-order genetic interactions in a  
44 typical biological system, in which possible phenotypic values for a trait are bounded in a limited range.  
45 Previously we proposed a network reconstitution (formerly called signaling allocation) general linear  
46 model (NR model), which assumes violation of the distributive law [2]. This non-distributivity  
47 assumption led to use of the average of interactions in each order (not including 1-gene effects) in  
48 estimation of the highest order interaction in question. Whereas the NR model resolved problems  
49 caused by non-distributivity in genetic interactions, I recently recognized an inconsistency in the NR  
50 model, which was caused by the assumption of additive relationships among the 1-gene effects (i.e.,  
51 non-interactive, main effects). This inconsistency was previously overlooked because the non-  
52 distributivity assumption did not constrain the 1-gene effects. The inconsistency was resolved by  
53 extending the averaging procedure to the 1-gene effects. I call the resulting model an averaging model. I  
54 demonstrate that the behavior of the averaging model is consistent regarding the level of  
55 representation of each of the 1-gene effect and multiple-gene interaction estimates. Furthermore, the  
56 averaging model allows consistent and intuitive interpretations of genetic interactions throughout all  
57 orders involved: a genetic interaction in the averaging model is a deviation of the phenotypic value of a  
58 multi-gene genotype from the average of the phenotypic values of all the genotypes that have one gene  
59 fewer than the interaction in question (e.g.,  $A;B;C = ABC - (AB + AC + BC) / 3$ , where “;” indicates the  
60 interaction defined in the averaging model and the italicized upper-case letters denote genotypes  
61 carrying various combinations of wild-type alleles *A*, *B*, and *C*). I propose the averaging model as a  
62 standard general linear model for study of multi-gene interactions.

63

64

65

## 66 RESULTS AND DISCUSSION

67

68 *Objective of the study*

69  
70 I define a multi-gene system as one in which multiple genes affect a single quantitative trait while each  
71 of the genes can have two states, functional and non-functional, arising from the wild-type and null  
72 mutant alleles, respectively. Such a system necessarily implies a gene network, in which the gene  
73 functions are not organized in a series (i.e., not in a single pathway). This is because a series of genes,  
74 each of which can only take a functional or non-functional state, can only generate an on or off output,  
75 so it is not quantitative. Instead, such a gene network must have a converging node(s) to generate a  
76 single trait. Converging nodes are sources of complex system behaviors [5, 6]. For a data set, I consider  
77 the measurement of the quantitative trait as the phenotype and measurements made with exhaustively  
78 combinatorial genotypes (i.e., for a  $n$ -gene system, the number of the exhaustively combinatorial  
79 genotypes is  $2^n$ ).

80  
81 The objective of this study is to best describe the output of such a multi-gene system using the general  
82 linear model framework to facilitate mechanistic interpretations of the system behavior. Limiting the  
83 approach to a standard approach using the general linear model framework is associated with  
84 drawbacks because many biological systems contain non-linear components. However, a standard  
85 approach using the general linear model framework has practical advantages in actual applications. In a  
86 multi-gene system, usually we do not have sufficient knowledge to assume a particular, parameterized  
87 non-linear model for the system. In addition, we often lack quantitative input-output relationship  
88 information, which would help to constrain parameter values in a more complex model. Furthermore,  
89 fitting a general linear model is computationally easier and more accurate compared with fitting  
90 complex non-linear models. The general linear model could serve as a simple and versatile platform in  
91 many cases.

92  
93  
94 *General notation rules*

95  
96 In this paper, I assume that all the genes of interest are homozygous for diploid organisms. A single gene  
97 is denoted by a single alphabetical letter in italics, with the upper-case letter for the wild-type allele and  
98 the lower-case letter for the null mutant allele. For example, *ABc* represents the genotype with the wild-  
99 type alleles for genes *A* and *B* and the mutant allele for gene *C*. When a description does not require  
100 noting the mutant alleles, I also use the genotype notation omitting the mutant alleles, such as *AB*  
101 instead of *ABc* for the purpose of simplicity, clarity, and generalization. The phenotype of a particular  
102 genotype is represented by the genotype notation. The non-italic lower-case letters, such as *a*, *b*, and *c*,  
103 represent the mutant allele effects defined in comparison to the wild-type alleles. The wild-type allele  
104 effects, represented by non-italic upper-case letters, such as *A*, *B*, and *C*, are defined in comparison with  
105 the mutant allele. The additive effect of *A* and *B* is denoted using a plus sign between them, *A + B*. The  
106 interaction between *A* and *B* effects on the phenotype in the additive model context is denoted using a  
107 colon between them, *A:B*. I will define another type of interaction between *A* and *B* effects on the  
108 phenotype in the averaging model context below, which is denoted using a semicolon between them,  
109 *A;B*. In a mechanistic network model underlying the phenotype observation, the node corresponding to  
110 gene *A* and the output of the node are denoted as *nA*.

111

112 I typically use a 3-gene system, *ABC*, as an example for the sake of simplicity. I also use systems with  
 113 more genes for cases in which this makes the impacts in question clearer. I typically omit the intercept  
 114 term in linear models for simplicity. The points discussed in the following text can be generalized to a  
 115 system consisting of an arbitrary number of genes.

116

117

118 *Comparing to the most disrupted state instead of the intact state gives better interpretability*

119

120 A convention in genetics is to compare a mutant phenotype to the wild-type phenotype. Here I argue  
 121 that instead, comparing a phenotype of any genotype to the phenotype of the most disrupted state,  
 122 e.g., comparing to the triple mutant state in a 3-gene system, leads to much better mechanistic  
 123 interpretations. In this section, for the sake of simplicity, I use a system defined by an ANOVA-based, 3-  
 124 gene additive model although I will subsequently point out a separate issue associated with the additive  
 125 model for a multi-gene system.

126

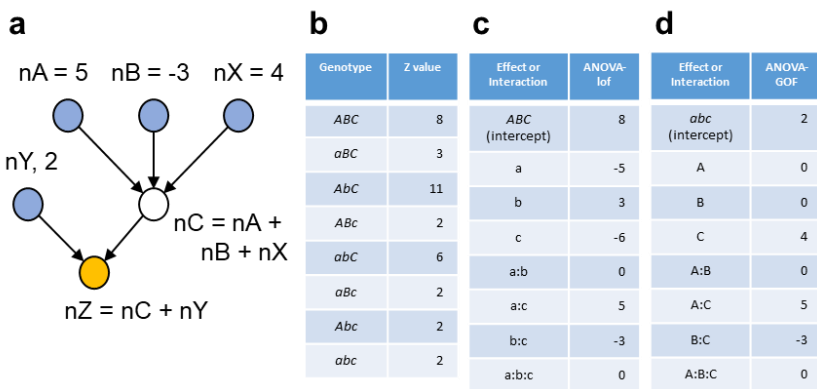

127

Fig. 1. A simple network behavior can be well described by the wild-type allele effects of a multi-gene system but not by the mutant allele effects. (a) A mechanistic model of a network containing 3 nodes that can be mutationally manipulated (a 3-gene system). The network consists of 6 nodes, among which *nA*, *nB*, and *nC* are mutationally manipulable and *nX*, *nY*, and *nZ* are not. The output of each node is given either as a value or an equation. The output of *nZ* is the quantitative phenotype of the system. (b) The phenotype values of all 8 combinatorial genotypes. (c) The values for the mutant allele effects and interactions. (d) The values for the wild-type allele effects and interactions.

128

129 Fig. 1a shows the mechanistic network underlying a system with 6 nodes, in which three nodes (*nA*, *nB*,  
 130 and *nC*) can be manipulated by mutations and the other three (*nX*, *nY*, and *nZ*) cannot. Thus, for the  
 131 purpose of genetic analysis, this is a 3-gene system. *nA*, *nB*, *nX*, and *nY* are input nodes, and their values  
 132 are arbitrarily set at 5, -3, 4, and 2, respectively. *nZ* is the output node, and the output of *nZ* can be  
 133 measured as the quantitative trait of the system. Simple additive rules at nodes *nC* and *nZ* are assumed,  
 134  $nC = nA + nB + nX$  and  $nZ = nC + nY$ , respectively. Fig. 1b shows the *nZ* output (i.e., phenotype) of 8  
 135 exhaustively combinatorial genotypes. Fig. 1c shows the effects and interactions of the mutant alleles

136 that are calculated according to an ANOVA model with interaction. Fig. 1d shows the effects and  
137 interactions of the wild-type alleles that are calculated according to an ANOVA model with interaction.  
138 With Fig. 1d, it is easy to reconstitute the mechanistic network shown in Fig. 1a: there is a basal activity  
139 of 2 without any of A, B, or C; A and B are not active by themselves, while C has its own activity of 4  
140 regardless of A and B; the connection between A and C is positive with a value of 5, and the connection  
141 between B and C is negative with a value of -3; No A:B:C interaction means that additive effects up to  
142 two-gene interactions can explain the system behavior completely. In comparison, mechanistic  
143 interpretations based on Fig. 1c are not simple.

144  
145 It is intuitive that mechanistically interpreting a system with functional components (i.e., wild-type  
146 alleles) is much more straightforward than mechanistically interpreting an unknown system using its  
147 deficiencies (i.e., mutant alleles). The 3-gene example system described above clearly demonstrates this  
148 principle. I conclude that a system consisting of multiple genes should be interpreted using wild-type  
149 allele effects. I will subsequently focus on modeling a system with wild-type allele effects and their  
150 interactions.

151  
152  
153 *Laws of algebra*

154  
155 An additive model of gene effects and interactions involves two operators: additive, "+", and interactive,  
156 ":". Different models can be derived if we assume different laws for these operations. Three types of  
157 laws define algebra involving two operators: commutative, associative, and distributive laws. The  
158 commutative laws are  $A + B = B + A$  and  $A:B = B:A$ . The associative laws are  $(A + B) + C = A + (B + C)$  and  
159  $(A:B):C = A:(B:C)$ . The distributive law is  $(A + B):C = A:C + B:C$ .

160  
161 I assume the commutative laws for both "+" and ":" because a single quantitative phenotype cannot  
162 experimentally distinguish  $A + B$  from  $B + A$  or  $A:B$  from  $B:A$ . I also assume the associative law for "+"  
163 since without this assumption the general linear model framework cannot be used.

164  
165 The associative law for ":" is also required for the general linear model framework (see below).  
166 However, as I show below, the impact of a violation of the associative law for ":" can be moderated  
167 using an averaging principle, in which the arithmetic mean of multiple different expressions for the same  
168 quantity is taken as the true value of the quantity. This moderation by the averaging principle is  
169 important in applications of the general linear model framework to multi-gene systems because we  
170 cannot generally assume that the associative law for ":" holds. For example, in the case of Fig. 1,  $A:B = 0$ ,  
171 and thus,  $(A:B):C = 0$ . However,  $B:C \neq 0$ , so,  $A:(B:C)$  may not be 0 particularly when  $A:C \neq 0$ . Thus,  $(A:B):C$   
172  $\neq A:(B:C)$  could happen.

173  
174 In the following sections, I will show that the distributive law is required in the additive model. I will also  
175 show that a range-limiting non-linearity of a system, such as a saturation response, would violate the  
176 distributive law. Such responses are common in biological systems. Further I will show that there is a

177 general linear model that allows violation of the distributive law under the assumption of the averaging  
178 principle. I call this model an averaging model.

179  
180

### 181 *Derivation of the averaging model*

182

183 The part of the following discussion describing derivation of the NR model was modified from Text S1 in  
184 [2]. In this section, for simplicity the intercept value (i.e., the phenotype value for the most disrupted  
185 state) is subtracted from all measured values so that the intercept value is 0.

186

187 According to the additive model, I assume  $AB = A + B + A:B$  ... (1) as the starting point. In this case, the  
188 interaction is the deviation of the corresponding genotype from arithmetic addition of the 1-gene  
189 effects. Let's extend this to a system consisting of three genes  $A$ ,  $B$ , and  $C$ . The phenotype  $ABC$  can be  
190 considered as being expressed in three different ways: adding  $C$  to the genetic background of  $AB$ ; adding  
191  $A$  to the genetic background of  $BC$ ; or adding  $B$  to the genetic background of  $CA$ .

192 By adding  $C$  to  $AB$ , the genotype  $ABC$  is expressed as:

$$193 \quad ABC = AB + C + AB:C = (A + B + A:B) + C + AB:C = A + B + C + A:B + AB:C \quad \dots (2)$$

194 If the distributive law is not assumed, (2) cannot be simplified.

195 If the distributed law is assumed, (2) can be simplified to:

$$196 \quad ABC = A + B + C + A:B + (A + B + A:B):C = A + B + C + A:B + B:C + C:A + (A:B):C \quad \dots (3)$$

197 Similarly, if the distributive law is not assumed:

$$198 \quad \text{By adding } A \text{ to } BC, \quad ABC = A + B + C + B:C + BC:A \quad \dots (4)$$

$$199 \quad \text{By adding } B \text{ to } CA, \quad ABC = A + B + C + C:A + CA:B \quad \dots (5)$$

200 If the distributive law is assumed:

$$201 \quad \text{By adding } A \text{ to } BC, \quad ABC = A + B + C + A:B + B:C + C:A + A:(B:C) \quad \dots (6)$$

$$202 \quad \text{By adding } B \text{ to } CA, \quad ABC = A + B + C + A:B + B:C + C:A + B:(C:A) \quad \dots (7)$$

203

204 Although the expressions are not the same, (3), (6), and (7) must be the same in a model to explain  $ABC$ .  
205 Therefore, for this model framework to work exactly, the associative law for the interaction operator ":"  
206 is necessary,

$$207 \quad (A:B):C = A:(B:C) = B:(C:A) = A:B:C \quad \dots (8)$$

208 If (8) is true, (3), (6), and (7) become the same expression:

$$209 \quad ABC = A + B + C + A:B + B:C + C:A + A:B:C \quad \dots (9)$$

210 (9) is the additive model for three genes. This can be extended to a system consisting of more genes. In  
211 summary, the additive model is a good description of a multi-gene system if the associative law for ":"  
212 and the distributive law hold.

213

214 However, as discussed above, the associative law cannot be generally assumed for the ":" operator in a  
215 multi-gene system. This contradiction about associativity indicates a failure of the general linear model  
216 as a general description of a multi-gene system. A compromise to maintain the general linear model  
217 framework is to define  $ABC$  as the arithmetic mean of (3), (6), and (7):

$$218 \quad ABC = \left\{ \frac{A + B + C + A:B + B:C + C:A + (A:B):C}{3} \right\} + \left\{ \frac{A + B + C + A:B + B:C + C:A + A:(B:C)}{3} \right\}$$

$$\begin{aligned} &+ \{ A + B + C + A:B + B:C + C:A + B:(C:A) \} / 3 \\ &= A + B + C + A:B + B:C + C:A + \{ (A:B):C + A:(B:C) + B:(C:A) \} / 3 \dots (10) \end{aligned}$$

I call this practical approach to avoiding the contradiction in the general linear model by averaging all possible cases an averaging principle.

Since  $\{ (A:B):C + A:(B:C) + B:(C:A) \}$  cannot be expressed by the lower order terms,  $A$ ,  $B$ ,  $C$ ,  $A:B$ ,  $B:C$ , and  $C:A$ , it is reasonable to define  $A:B:C = \{ (A:B):C + A:(B:C) + B:(C:A) \} / 3 \dots (11)$ . Then,

$$ABC = A + B + C + A:B + B:C + C:A + A:B:C \dots (9)$$

Thus, with the averaging principle, the additive model can conform to the assumption of no associativity in the interaction operator “:”. This can be extended to a system consisting of more genes. In summary, the additive model should be a reasonable description of a multi-gene system if the distributive law holds.

If the distributive law cannot be assumed, (2), (4), and (5) must still be the same to express  $ABC$ . Here again we observe a failure of the linear model as a general description of a multi-gene system. I apply the averaging principle to (2), (4), and (5) to express  $ABC$ :

$$\begin{aligned} ABC &= \{ [A + B + C + A:B + AB:C] + [A + B + C + B:C + BC:A] + [A + B + C + C:A + CA:B] \} / 3 \\ &= A + B + C + (A:B + B:C + C:A) / 3 + (AB:C + BC:A + CA:B) / 3 \dots (12) \end{aligned}$$

Since  $(AB:C + BC:A + CA:B)$  cannot be expressed by the lower order terms,  $A$ ,  $B$ ,  $C$ ,  $A:B$ ,  $B:C$ , and  $C:A$ , it is reasonable to define  $A;B;C = (AB:C + BC:A + CA:B) / 3 \dots (13)$ . I use the semicolon “;” to distinguish this different definition of interaction from that of the interaction in the additive model and call “;” an averaging interaction operator and “:” an additive interaction operator.

$$ABC = A + B + C + (A:B + B:C + C:A) / 3 + A;B;C \dots (14)$$

Therefore, if the distributive law is not assumed, the average of the 2-gene additive interactions should be used to express the all wild-type allele state of  $ABC$ . In general, the rule that the terms in each order of the interactions (2-gene additive interactions, 3-gene averaging interactions, 4-gene averaging interactions, ...) must be averaged can be derived by extending this to a system with more genes.

For example, with a system consisting of 4 genes,  $A$ ,  $B$ ,  $C$ , and  $D$ :

$$ABCD = A + B + C + D + (A:B + A:C + A:D + B:C + B:D + C:D) / 6 + (A;B;C + A;B;D + A;C;D + B;C;D) / 4 + A;B;C;D \dots (15)$$

This is the NR model [7] (previously called the signaling allocation model [2]). Note that in the NR model, 2-gene interactions are additive interactions while 3 or higher order interactions are averaging interactions.

The assumption of the non-distributivity does not require any more changes in the model. However, the above derivation of NR model started with an arbitrary definition of the 2-gene additive interaction,  $AB = A + B + A:B \dots (1)$ , which is the reason the NR model is a mixture of additive and averaging interactions. The model would be more mathematically consistent if the averaging interaction definition is extended to 1-gene effect terms to make the 2-gene interactions averaging interactions as well, i.e.,  $AB = (A + B) / 2 + A;B \dots (16)$ . I demonstrate in a subsequent section that (16) is indeed required for mathematical consistency of the model.

By applying (16):



261  $ABC = (A + B + C) / 3 + (A;B + B;C + C;A) / 3 + A;B;C \dots (17)$

262  $ABCD = (A + B + C + D) / 4 + (A;B + A;C + A;D + B;C + B;D + C;D) / 6 + (A;B;C + A;B;D + A;C;D + B;C;D) / 4 +$   
 263  $A;B;C;D \dots (18)$

264 Now the rule is that the terms in each order of the interactions, including 1-gene effects (the first order),  
 265 must be averaged. (17) and (18) are equivalents of:

266  $ABC = (AB + BC + CA) / 3 + A;B;C \dots (19)$

267  $ABCD = (ABC + ABD + ACD + BCD) / 4 + A;B;C;D \dots (20)$

268 Thus, the highest order averaging interaction is defined as the deviation of the corresponding genotype  
 269 from the average of all genotypes with one gene fewer. This definition of the averaging interaction is  
 270 highly interpretable. I call this extended model with all averaging interactions an averaging model. With  
 271 the definitions of the averaging interactions of different orders in (16), (19), and (20), it is clear the  
 272 averaging model does not require the distributive law because these definitions do not include any  
 273 terms that could be affected by whether the distributive law holds or not.

274

275 Note that the mean estimates from the additive model, NR model, averaging model, and 1-way ANOVA  
 276 for all genotypes are just different ways to linearly decompose the phenotype values (when the full  
 277 model terms are kept). Thus, when the models are fit to actual data with replication, all these models  
 278 yield the same fitted and residual values. The numbers of estimated values are the same, i.e., the  
 279 models have the same residual degree of freedom. Therefore, I use only the mean estimates of the  
 280 models for my arguments in the following comparisons of the models. The coefficient matrices to solve  
 281 the linear equations for the means in the three models using the genotype mean values in a 3-gene  
 282 system are shown in Fig. 2.

283

| a Additive model |           |   |   |   |     |     |     |       |
|------------------|-----------|---|---|---|-----|-----|-----|-------|
|                  | Intercept | A | B | C | A;B | A;C | B;C | A;B;C |
| triple.mut       | 1         | 0 | 0 | 0 | 0   | 0   | 0   | 0     |
| A                | 1         | 1 | 0 | 0 | 0   | 0   | 0   | 0     |
| B                | 1         | 0 | 1 | 0 | 0   | 0   | 0   | 0     |
| C                | 1         | 0 | 0 | 1 | 0   | 0   | 0   | 0     |
| AB               | 1         | 1 | 1 | 0 | 1   | 0   | 0   | 0     |
| AC               | 1         | 1 | 0 | 1 | 0   | 1   | 0   | 0     |
| BC               | 1         | 0 | 1 | 1 | 0   | 0   | 1   | 0     |
| ABC              | 1         | 1 | 1 | 1 | 1   | 1   | 1   | 1     |

  

| b NR model |           |   |   |   |     |     |     |       |
|------------|-----------|---|---|---|-----|-----|-----|-------|
|            | Intercept | A | B | C | A;B | A;C | B;C | A;B;C |
| triple.mut | 1         | 0 | 0 | 0 | 0   | 0   | 0   | 0     |
| A          | 1         | 1 | 0 | 0 | 0   | 0   | 0   | 0     |
| B          | 1         | 0 | 1 | 0 | 0   | 0   | 0   | 0     |
| C          | 1         | 0 | 0 | 1 | 0   | 0   | 0   | 0     |
| AB         | 1         | 1 | 1 | 0 | 1   | 0   | 0   | 0     |
| AC         | 1         | 1 | 0 | 1 | 0   | 1   | 0   | 0     |
| BC         | 1         | 0 | 1 | 1 | 0   | 0   | 1   | 0     |
| ABC        | 1         | 1 | 1 | 1 | 1/3 | 1/3 | 1/3 | 1     |

  

| c Averaging model |           |     |     |     |     |     |     |       |
|-------------------|-----------|-----|-----|-----|-----|-----|-----|-------|
|                   | Intercept | A   | B   | C   | A;B | A;C | B;C | A;B;C |
| triple.mut        | 1         | 0   | 0   | 0   | 0   | 0   | 0   | 0     |
| A                 | 1         | 1   | 0   | 0   | 0   | 0   | 0   | 0     |
| B                 | 1         | 0   | 1   | 0   | 0   | 0   | 0   | 0     |
| C                 | 1         | 0   | 0   | 1   | 0   | 0   | 0   | 0     |
| AB                | 1         | 1/2 | 1/2 | 0   | 1   | 0   | 0   | 0     |
| AC                | 1         | 1/2 | 0   | 1/2 | 0   | 1   | 0   | 0     |
| BC                | 1         | 0   | 1/2 | 1/2 | 0   | 0   | 1   | 0     |
| ABC               | 1         | 1/3 | 1/3 | 1/3 | 1/3 | 1/3 | 1/3 | 1     |

Fig. 2. Matrices for the linear equations to obtain model coefficients from the genotype values in a 3-gene system for (a) additive, (b) NR, and (c) averaging models. The rows are genotypes and the columns are model variables. “:” and “;” indicate the additive and averaging interactions, respectively.

284

285

286 *Violation of the distributive law is prevalent in multi-gene systems*

287

288 The averaging model does not assume the distributive law. Do we really need to consider non-  
 289 distributivity in a biological system? Let's consider a simple 3-gene system, in which  $n_A$  and  $n_B$  are input  
 290 nodes and  $n_C$  is the output node (Fig. 3a). Mechanistically, signals from  $n_A$  and  $n_B$  are first summed, and  
 291 then modulated by a non-linear function  $f_1$  before the signal is output from  $n_C$ . Thus,  
 292  $(A + B):C = n_C = f_1(n_A + n_B) \dots (21)$   
 293  $A:C + B:C = f_1(n_A) + f_1(n_B) \dots (22)$   
 294 Therefore, if the distributive law holds,  
 295  $f_1(n_A + n_B) = f_1(n_A) + f_1(n_B) \dots (23)$   
 296  
 297 Let's make  $f_1$  a Michaelis-Menten function for a saturating response (Fig. 3b):  
 298  $f_1(x) = \frac{10}{1+\frac{x}{7}} \dots (24)$   
 299 When  $n_A = 5$ ,  $n_B = 2$ ,  
 300  $f_1(n_A + n_B) = f_1(5 + 2) = 5$   
 301  $f_1(n_A) + f_1(n_B) = f_1(5) + f_1(2) = 4.16\dots + 2.22\dots = 6.38\dots$   
 302 Thus,  $f_1(n_A + n_B) \neq f_1(n_A) + f_1(n_B) \dots (25)$   
 303 and the distributive law is violated.  
 304 Generally, non-linearity in a system leads to violation of the distributive law.  
 305

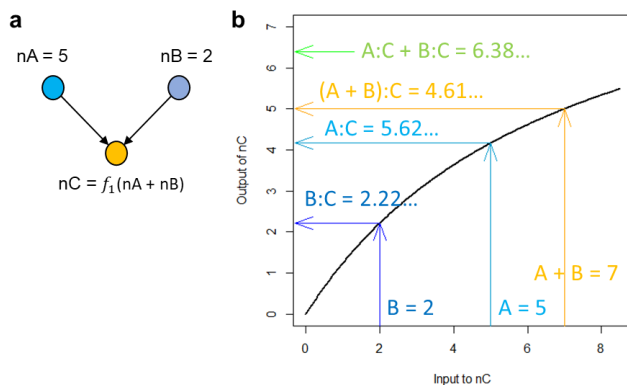

Fig. 3. Non-linearity in a system violates the distributive law. (a) a 3-gene system, in which signals from  $n_A$  and  $n_B$  feed into  $n_C$ . The output of  $n_C$  is defined as  $f_1(n_A + n_B)$ . (b) When  $f_1(x) = \frac{10}{1+\frac{x}{7}}$ , the input-output relationships at  $n_C$  are shown. If the input is  $n_A$ , the output is expressed as A:C in the additive model. This plot clearly shows that  $(A + B):C \neq A:C + B:C$  (Y-axis values in orange and green, respectively), a violation of the distributive law. (the y-axis values in orange and green)

306  
 307  
 308 A saturating response limits the output range. Without non-linearity, the range of the system output is  
 309 not limited, and this is the condition the additive model requires. Thus, the additive model generally  
 310 cannot be used in a system consisting of multiple genes (more than 2 genes, strictly speaking: see  
 311 below) when the phenotype value range is limited compared to the ranges of the gene effects and  
 312 interactions. To demonstrate this point, I use a 7-gene system as this problem becomes more severe  
 313 when more genes are in the system. With 7 genes, the number of exhaustively combinatorial genotypes  
 314 is  $2^7 = 128$ . I randomly generated phenotype values by sampling from a uniform distribution ranging  
 315 from 1 to 10, and each model was solved using these randomly generated data values. This procedure  
 316 was repeated 10,000 times and the model estimate distributions, except for the model intercept (i.e.,  
 317 the septuple mutant value), were visualized as a box plot (Fig. 4). Fig. 4a shows that in the additive

318 model, the higher the order of interactions is, the higher the representations of the interactions are. The  
319 length of the box (the difference between the 75<sup>th</sup> and 25<sup>th</sup> percentiles) of the 7-gene interaction is  
320 about 7.5 times larger than those of the 1-gene effects. Therefore, if the additive model is used, the  
321 absolute values of higher order additive interactions are grossly overestimated in general. This problem  
322 is much smaller using the NR model (Fig. 4b). Note the scale difference in the y-axes between Fig. 4a and  
323 Figs. 4b and 4c: the distributions of the 1-gene effects are essentially the same across the models.  
324 However, the NR model still has an overrepresentation issue with the 2-gene additive interactions,  
325 suggesting that the NR model is still affected when the phenotype value range is limited. The  
326 distributions of estimates were very consistent across all the effects and averaging interactions in the  
327 averaging model (Fig. 4c). These results strongly suggest that the averaging model well handles non-  
328 distributivity arising from range-limiting non-linearity in the system response even when the number of  
329 the genes in the system is high.  
330

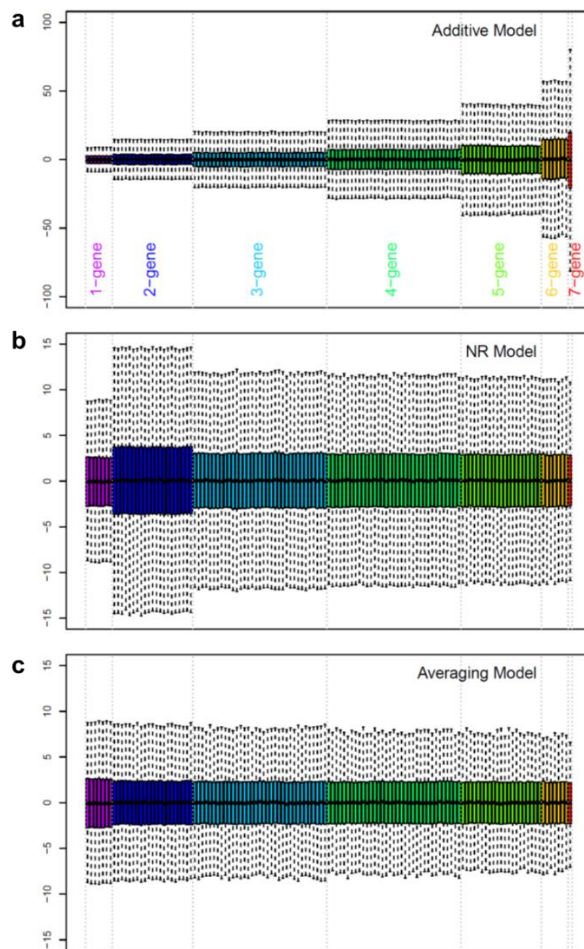

Fig. 4. Distributions of the gene effects and interaction values when the phenotype values were randomly sampled from a uniform distribution with (a) additive, (b) NR, and (c) averaging models. Each order of interactions is color-coded separately, and the color coding is shown in the bottom of (a). Note that the scales in the y-axes are very different in (a) compared to (b) and (c).

331  
332  
333  
334  
335

*Evidence of non-distributivity in an actual multi-gene data set*

336 Do we see this problem associated with non-distributivity in actual biological systems? We initially  
 337 recognized the problem in 4-gene systems [2] when we started to omit high order additive interaction  
 338 terms from the full additive model. We expected that such reduced models should be good  
 339 approximations of the model containing higher orders of additive interactions. However, in the full  
 340 additive model, when the 4-gene additive interaction term was omitted, the estimates for the 3-gene  
 341 additive interactions were reduced substantially (Fig 5a, black and red segments for the 3-gene additive  
 342 interactions). Smaller, yet still substantial increases of the 2-gene additive interactions were also evident  
 343 (black and red segments for the 2-gene additive interactions). Large changes of estimate values in the  
 344 opposite directions for the 3-gene and 2-gene additive interactions strongly suggests artifactual  
 345 overrepresentation of the 4-gene additive interaction. In the full NR model, the estimate changes in the  
 346 3-gene averaging and 2-gene additive interactions when the 4-gene averaging interaction term was  
 347 omitted were much smaller (Fig. 5b). In the averaging model, the estimate changes in the 3-gene and 2-  
 348 gene averaging interactions when the 4-gene averaging interaction term was omitted were almost  
 349 unnoticeable (Fig. 5c).  
 350

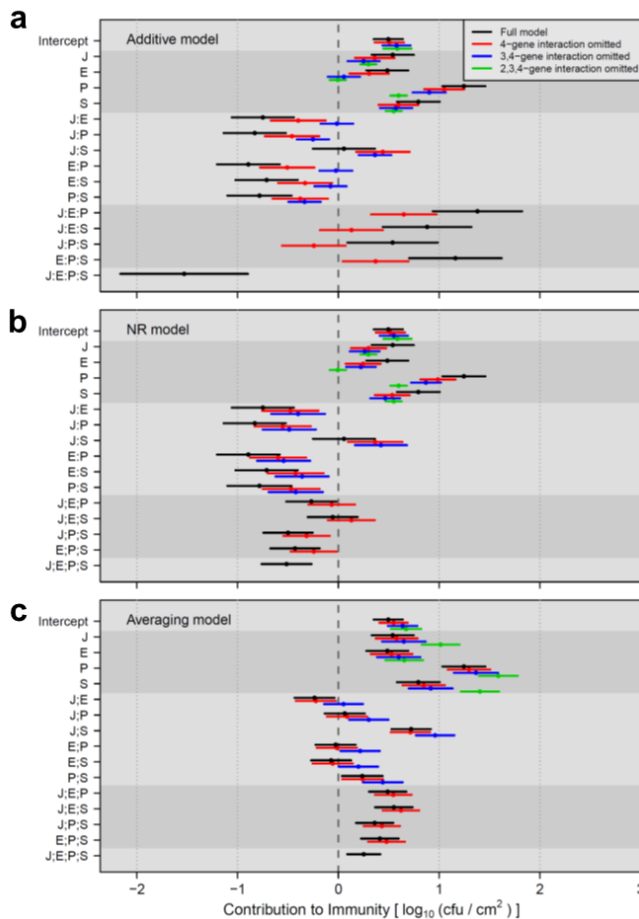

Fig. 5. The coefficient estimates for the contribution to immunity using the data from Tsuda et al. in (a) additive, (b) NR, and (c) averaging models. The 95% confidence interval is shown as a horizontal bar, with the mean as a point. Different levels of model reduction (omitting higher order interactions from the model) are color-coded according to the color code in (a). Different shades of gray background are used to show different orders of interactions. “:” and “;” indicate additive and averaging interactions, respectively.

351  
 352

353 Another evident trend in the additive model is that the 95% confidence intervals (the lengths of the  
 354 horizontal lines) were wider for the higher order additive interactions (Fig. 5a; compare the segments of  
 355 the same color, which have the same order of model reduction). With the NR model, the confidence

356 interval was widest with the 2-gene additive interactions although overall confidence interval width  
357 differences were much smaller than in the additive model (Fig. 5b). This confidence interval width trend  
358 suggest that the overrepresentation of higher order averaging interactions was strongly reduced in the  
359 NR model compared to the additive model. In the averaging model, the widths of the confidence  
360 intervals were quite consistent across the orders of averaging interactions. The trend of the confidence  
361 interval width in the three models directly corroborates the observations made using random simulation  
362 data in Fig. 4.

363  
364 An additional evident trend in the confidence intervals in the additive model is that when the same  
365 coefficients (1-gene effects and additive interactions) were compared, the more reduced the model was,  
366 the narrower the confidence intervals were (Fig. 5a). With the NR model, the trend of narrower  
367 confidence intervals in the more reduced models was evident only in the 1-gene effects (Fig. 5b). This  
368 trend suggests that some problem remained with the 1-gene effect estimation in the NR model. In the  
369 averaging model, the widths of the confidence intervals were very consistent across the orders of model  
370 reduction (Fig. 5c). In summary, the problem associated with non-distributivity in this biological data set  
371 is evident in the additive model while the averaging model appears free of this problem.

372  
373

374 *Why does the averaging model describe a multi-gene system better than the additive model?*

375  
376 Let's consider simple additive and averaging models with no interaction using a 7-gene system. With the  
377 additive model,  $ABCDEFG = A + B + C + D + E + F + G$ . It is highly conceivable that the sum of all 1-gene  
378 effects could go well outside the system output range. In such a case, it is necessary for the additive  
379 model to have non-zero additive interaction(s) to keep the  $ABCDEFG$  phenotype within the system  
380 output range. On the other hand, with the averaging model,  $ABCDEFG = (A + B + C + D + E + F + G) / 7$ ,  
381 the  $ABCDEFG$  phenotype range is bounded by the maximum and minimum of the 1-gene effects without  
382 non-zero averaging interactions. Thus, with the additive model, a range-limiting non-linearity generally  
383 forces non-zero additive interaction(s) in a multi-gene system while this does not occur in the averaging  
384 model.

385  
386 Next, let's look at how interactions affect estimates of other interactions. A range-limiting non-linearity  
387 can be handled easily with the additive model in a 2-gene system.  $AB = A + B + A:B \dots (1)$ . Any non-linear  
388 effect can be attributed to the 2-gene additive interaction  $A:B$ , and therefore, non-linearity is not an  
389 issue. However, in a 3-gene system,  $ABC = A + B + C + A:B + A:C + B:C + A:B:C \dots (9)$ , the 2-gene additive  
390 interactions in (9) likely have values different from the 2-gene additive interactions in the 2-gene  
391 systems (e.g.,  $A:B$  in (1) and (9) should have different values) due to the non-linearity. Consequently,  
392 estimation of an additive interaction accumulates this type of non-linearity-associated errors from the  
393 lower order additive interaction estimates: i.e., non-linearity-associated errors propagate in estimation  
394 of higher-order additive interactions. This problem of propagating errors was clearly demonstrated by  
395 overrepresentation of higher-order additive interaction estimates (Fig. 4a) and by wider confidence  
396 intervals for higher-order additive interaction estimates (Fig. 5a).

397

398 On the other hand, estimation of an averaging interaction requires only observed values and does not  
399 require any of the lower-order averaging interaction estimates (e.g., equations (16), (19), and (20) for  
400 the 2-, 3-, and 4-gene averaging interactions). Thus, non-linearity-originated error is confined to each  
401 averaging interaction and does not propagate (Figs. 4c and 5c). This is the reason the averaging model  
402 performs better than the additive model when the range-limited system involves more than two genes.

403  
404

#### 405 *Interpretation of the averaging model outcome*

406

407 It should be emphasized that the definitions of the interactions are different in additive and averaging  
408 models. How do different interaction definitions affect interpretations of the 1-gene effects and  
409 interactions? With the additive model, the 2-gene additive interaction is understood as the difference  
410 from the addition of the 1-gene effects,  $A:B = AB - (A + B) \dots (1)'$ . When  $A, B, A:B > 0$ , A and B have a  
411 synergistic effect. When  $A, B > 0, A:B < 0$ , A and B have a compensating effect (Fig. 6a). However, such  
412 interpretations of additive interaction, synergistic or compensating, become unclear when A and B have  
413 opposite signs (Fig. 6b). In addition, with more genes in a system, the interpretation of higher-order  
414 additive interactions become nonintuitive. For example, the 3-gene additive interaction is  $A:B:C = ABC -$   
415  $(A + B + C + A:B + A:C + B:C) \dots (9)'$  (Fig. 6c).

416

417 In contrast, the interpretation of averaging interactions in the averaging model is consistent and highly  
418 interpretable, however many genes are in the system and whatever the orders of averaging interactions  
419 are, i.e., the averaging model is highly scalable to the number of genes in the system. An averaging  
420 interaction is the deviation of the corresponding genotype from the average of all involved genotypes  
421 that have one gene fewer (equations (19) and (20)). For example, in a 2-gene system,  $A;B = AB - (A +$   
422  $B)/2 \dots (13)'$  (Fig. 6d). Note that not just the values but also the signs of the interaction could be  
423 different between the additive and averaging interactions (compare  $AB$  (case 1) in Figs. 6a and 6d). The  
424 interpretations of averaging interactions are consistent even when A and B have opposite signs (Fig. 6e)  
425 or the system has three genes, A, B, and C (Fig. 6f).

426

427 In the case of a 3-gene averaging interaction,  $A;B;C = ABC - (AB + AC + BC) / 3 \dots (19)'$  (Fig. 6d). This  
428 could be a 3-gene interaction in a 7-gene system,  $A;B;C = ABCdefg - (ABcdefg + AbCdefg + aBCdefg) / 3$   
429  $\dots (19)''$ . Thus, the genotype notation not showing the mutant alleles, such as equation (19)', is a more  
430 generalized notation.

431

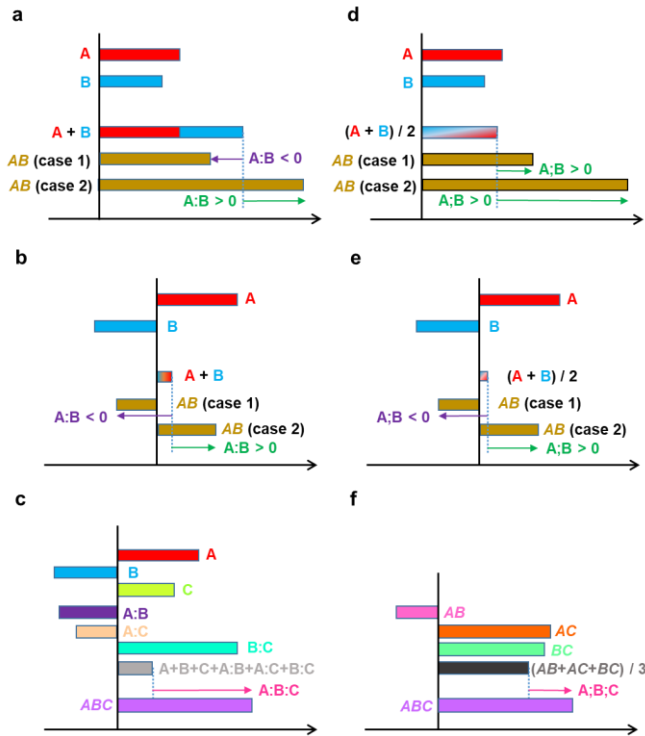

Fig. 6. Interpretations of interactions in (a-c) additive and (d-f) averaging models. (a, d) Two-gene interactions when both 1-gene effects A and B are positive. Two different cases (cases 1 and 2) of the AB phenotype values are used. (b, e) Two-gene interactions when 1-gene effects have opposite signs. (c, f) Three-gene interactions. ":" and "," indicate additive and averaging interactions, respectively.

432  
433

434 *The averaging model-based multi-gene analysis should contain only the genes significantly involved in*  
435 *the phenotype.*

436

437 Since the averaging interaction is the phenotypic deviation of the corresponding genotype from the  
438 average of all genotypes with one gene fewer, it is affected if the analysis includes unnecessary genes.  
439 Such unnecessary genes can be detected by comparing all the genotypes containing the gene in  
440 question to the corresponding genotypes without the gene. For example, in a 3-gene system with genes  
441 A, B, and C, the test for whether gene C should be included is whether any of  $ABC - AB$ ,  $AC - A$ ,  $BC - B$ ,  
442 and  $C - abc$  have values significantly different from 0. If none of them are significantly different from 0,  
443 gene C must be removed from the averaging model.

444

445

446 *Reinterpretation of previous results using the averaging model*

447

448 Using the averaging model, I reinterpreted results from my laboratory of exhaustively combinatorial  
449 genotype analysis in a 4-gene system, which were originally analyzed using the NR model shown in Fig. 6  
450 of [2]. The study consisted of four cases of inducible immunity in the model plant *Arabidopsis* against  
451 strains of the bacterial pathogen *Pseudomonas syringae*, which are designated as the AvrRpt2-ETI,  
452 AvrRpm1-ETI, flg22-PTI, and elf18-PTI cases. ETI is Effector-Triggered Immunity, and AvrRpt2 and  
453 AvrRpm1 are triggering effectors [8-12]. PTI is Pattern-Triggered Immunity, and flg22 and elf18 are  
454 triggering molecular patterns [13-15]. The inhibition of bacterial growth in the plant leaf, in  
455  $\log_{10}(\text{cfu}/\text{cm}^2)$ , was the immunity phenotype measure. The hub genes of four major signaling sectors

456 (subnetworks) in the plant immune signaling network were subjected to mutational analysis. The  
 457 signaling sectors were the jasmonate, ethylene, PAD4, and salicylate sectors, which are indicated as J, E,  
 458 P, and S, respectively. I also call their hub genes *J*, *E*, *P*, and *S*, in this context of analysis of the 4-gene  
 459 system. Biological and experimental details are provided in [2].

460

461 Each of the AvrRpt2-ETI, AvrRpm1-ETI, flg22-PTI, and elf18-PTI cases was first tested to determine  
 462 whether all four genes were significantly involved in the phenotype variation. Except for the elf18-PTI  
 463 case, all four genes were significant, and the averaging model for the 4-gene system was used. However,  
 464 the elf18-PTI phenotype was not significantly affected by the *J* gene in any genotype context. Therefore,  
 465 the averaging model for the 3-gene system with the *E*, *P*, and *S* genes was used.

466

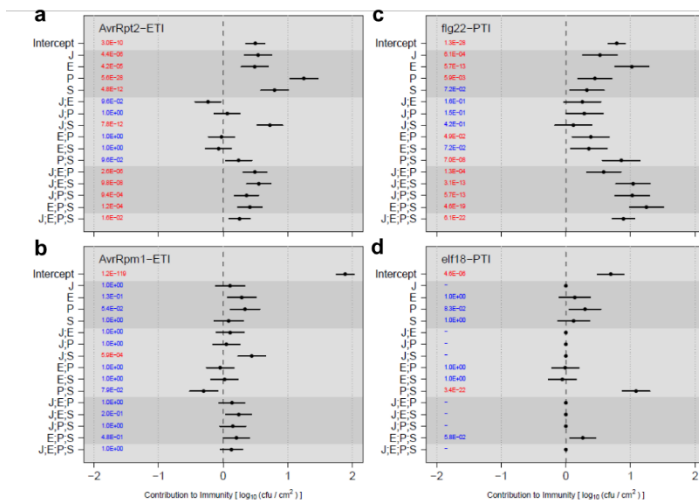

467

468

469 The results of applications of the averaging model to these four immunity cases are shown in Fig. 7. The  
 470 95% confidence interval is shown as a horizontal black bar with the mean estimate as the point in the  
 471 middle. In the left part of each plot, the Holm-corrected *p*-values smaller than 0.05, which are  
 472 considered significant, are shown in red.

473

474 There are several differences between the averaging and NR models. The 1-gene effects did not change  
 475 much since the 1-gene effect definition for the genotype with a single wild-type allele, *J*, *E*, *P*, or *S*, was  
 476 the same between the two models. The interactions changed substantially as the definitions of the  
 477 interactions are different. Although the relative differences within the interactions of the same order did  
 478 not change much between the two models, the interaction values in the averaging model were generally  
 479 higher than those in the NR models because the 1-gene effects were non-negative and the 1-gene  
 480 effects in genotypes with multiple wild-type alleles were averaged in the averaging model.

481

482 In AvrRpt2-ETI with the averaging model (Fig. 7a), the values for the 1-gene effects were all positive, and  
 483 *P* had the largest effect. Most 2-gene averaging interactions were not significant, indicating that addition  
 484 of another gene as the second gene does not change the immunity much from the average of 1-gene  
 485 effects of the first and the second genes. However, *J*; *S* was significantly positive: while the *J* and *S* effects

Fig. 7. The coefficient estimates for the contribution to immunity from averaging model analysis of the data in Tsuda et al. (a) AvrRpt2-ETI, (b) AvrRpm1-ETI, (c) flg22-PTI, and (d) elf18-PTI. The 95% confidence interval is shown as a horizontal bar, with the mean as a point. The Holm-corrected *p*-values are shown in the left part of each plot: red, *p* < 0.05; blue, *p* ≥ 0.05. The dataset used for AvrRpt2-ETI in Fig. 7a is the same as that in used in Fig. 5, and Fig. 7a is the same as the full model (black lines) in Fig. 5c. “;” and “:” indicate additive and averaging interactions, respectively.



486 are both positive, combining these two genes together (*JS* genotype) increases the immunity from the  
487 average of the *J* and *S* genotypes. All the 3-gene and 4-gene averaging interactions were significantly  
488 positive, indicating that all the genes increase immunity when added to the system as the 3<sup>rd</sup> or 4<sup>th</sup>  
489 genes. Note that the averaging model made interpretations of the 3-gene and 4-gene interactions easy  
490 and consistent.

491  
492 In AvrRpm1-ETI with the averaging model (Fig. 7b), most immunity was explained by the intercept (i.e.,  
493 the immunity level in the *jeps* genotype), showing that the quadruple mutant still maintains most of the  
494 immunity of wild-type plants. This observation can be explained by the fast kinetics of AvrRpm1-ETI  
495 signaling compared to AvrRpt2-ETI, in respect to the gating timing of the ETI-Mediated and PTI-Inhibited  
496 Sector (EMPIS) by PTI signaling [16]. Although all the 1-gene effects and the averaging interactions had  
497 lower amplitudes, they generally had a similar trend of up and down as those of AvrRpt2-ETI, suggesting  
498 that the 4-gene network apart from EMPIS behaves similarly in AvrRpm1-ETI and AvrRpt2 ETI. *J;S* was  
499 the only significant averaging interaction with a positive contribution to immunity.

500  
501 In flg22-PTI (Fig. 7c), all the 1-gene effects except *S* were significantly positive with *E* as the highest. The  
502 2-gene averaging interactions were largely low and/or not significant, except *P;S*, which was significantly  
503 and strongly positive. The 3-gene and 4-gene averaging interactions were significantly and strongly  
504 positive, indicating that all the genes substantially increase the immunity level when added to the  
505 system as the 3<sup>rd</sup> or 4<sup>th</sup> genes.

506  
507 In elf18-PTI (Fig. 7d), the *J* gene was removed and a 3-gene averaging model including the *E*, *P*, and *S*  
508 genes was used. Only *P;S* was significant among all the averaging model terms, except the intercept. The  
509 *P;S* averaging interaction was strongly positive, indicating that a single mutation in genes *P* or *S* almost  
510 completely abolishes the immunity. The difference in the importance of the *E* gene clearly separated  
511 flg22-PTI and elf18-PTI. Another difference between flg22-PTI and elf18-PTI was the 3-gene and 4-gene  
512 averaging interactions. All were strongly positive in flg22-PTI, and none were significant in elf18-PTI.

513  
514 It is noteworthy that the roles of *J;S* and *P;S* were very different in ETI and PTI. A strongly positive *P;S*  
515 averaging interaction was observed in PTI (Figs. 7c and 7d). Positive functional interactions between the  
516 *P* and *S* genes have been well documented in many aspects of plant immunity [17]. In contrast, this  
517 averaging interaction was insignificant in ETI, except for their contributions through higher-order  
518 averaging interactions, *J;P;S*, *E;P;S*, and *J;E;P;S*. On the other hand, a strongly positive *J;S* averaging  
519 interaction was observed in ETI while it was insignificant in PTI (Fig. 7). Although negative functional  
520 interactions between the *J* and *S* genes are often described in plant immunity [17], these two genes  
521 positively interact in ETI (Figs. 7a and 7b). In addition, in flg22-PTI the 3-gene and 4-gene averaging  
522 interactions were strongly positive while they were moderately positive in AvrRpt2-ETI. A disadvantage  
523 of strong 3-gene and 4-gene averaging interactions is that a mutation(s) in one or two genes results in  
524 large loss of immunity. Relatively weak 3-gene and 4-gene averaging interactions in ETI indicates that ETI  
525 is more resilient against damage to one or two of these major immune signaling sectors, which could be  
526 caused by pathogen effectors [6]. In summary, the averaging model analysis highlighted that while the  
527 4-gene system is important in both ETI and PTI (with flg22), how they are used in ETI and PTI is quite

528 different, and ETI is more resilient than PTI against perturbations to the signaling sectors. It also  
529 highlighted substantial differences, particularly in the role of the *J* and *E* genes, in regulation between  
530 flg22-PTI and elf18-PTI.

531

532

### 533 *Limitations of using the general linear model platform*

534

535 The goal of this study is to propose a standard statistical model that works reasonably well with most  
536 multi-gene systems to gain mechanistic information about the systems. Among the models discussed  
537 here, the additive, NR, and averaging models, the averaging model is the most versatile, consistent,  
538 scalable, and interpretable general linear model. Fundamentally all models are linear models, so of  
539 course they have limitations in applications to non-linear systems. I assumed the associative law for the  
540 addition operator “+”, which may not be true for every biological system. I also used the averaging  
541 principle, in which the arithmetic mean of multiple different expressions for the same quantity was  
542 taken as the true value of the quantity. This principle was used to practically accommodate the non-  
543 associativity of the interaction operators within the general linear model framework, which in principle  
544 does not allow non-associativity for the interaction operators. Although the averaging principle is  
545 probably the best compromise for the purpose of accommodating the non-associativity of interactions  
546 in the model framework, whether it truly provides a good approximation in the averaging model  
547 depends on the type of non-linearity. Since the highest order of averaging interaction is defined as the  
548 deviation of the corresponding genotype from the arithmetic mean of all involved genotypes with one  
549 gene fewer (equations (16), (19), and (20) and Fig. 6f), if the system is strongly non-linear in the  
550 phenotypic range of these genotypes with one gene fewer, the averaging principle fails and,  
551 consequently, the averaging model fails. However, with a range-limiting non-linearity, which does not  
552 have strong non-linearity in the middle of the phenotypic range, the chance that such major failure of  
553 the averaging principle and the averaging model occurs is not very high. Therefore, the averaging model  
554 should work well in systems with range-limiting non-linearity.

555

556

### 557 *Concluding Remarks*

558

559 I have demonstrated that multi-gene systems subjected to exhaustively combinatorial mutation analysis  
560 typically violate the distributive law and that therefore, the additive model is not appropriate for  
561 analysis of such systems consisting of more than two genes. In contrast, an averaging model conforms to  
562 non-distributivity and maintains consistency from the 1-gene effects to the highest order of averaging  
563 interactions. Furthermore, averaging model results are consistently and intuitively interpretable from  
564 the 1-gene effects to the highest order of averaging interactions. I propose the averaging model as a  
565 standard general linear model for combinatorial mutation analysis of multi-gene systems.

566

567

568

## 569 **METHODS**

570

## 571 *Data sets*

572

573 Biological data sets used in this study are the same data sets used in Figs. 6A and 6B in Tsuda et al.  
574 (2009). Each data set consists of bacterial counts ( $\log_{10}(\text{colony forming units/cm}^2)$ ) for 16 exhaustively  
575 combinatorial genotypes for a 4-gene system, with or without treatment, with replication. Since the raw  
576 bacterial count data were not published previously, they are provided as Supplemental Dataset 1.

577

578

## 579 *Random simulation with three models*

580

581 The simulation was performed with a 7-gene system. The phenotype values for  $2^7 = 128$  genotypes were  
582 randomly sampled from a uniform distribution ranging from 1 to 10. The 128 phenotype values were  
583 solved for the coefficients (gene effects and interactions) in each of the additive, NR, and averaging  
584 models. To solve the 128 equations per model, the 7-gene system matrix equivalent of the 3-gene  
585 system matrix in Fig. 2 was used (the matrices are provided in an R workspace file in Supplemental  
586 Dataset 2). This procedure was repeated 10,000 times for each model, and the distributions of each  
587 coefficient (except the intercept) across the repeats are shown by a box-and-whiskers in Fig. 4.

588

589

## 590 *Fitting averaging models to the data*

591

592 A linear mixed-effect model (the `lme` function in the `nlme` R package [18]) was used. This was because (i)  
593 each data set has factors regarding the experimental design, which were included as random effects in  
594 the model and (ii) the numbers of replicates were not the same across the genotype x treatment  
595 combinations. First, a linear mixed-effect model with the genotype x treatment interactions was fit to  
596 each of the data sets for “AvrRpt2-ETI”, “AvrRpm1-ETI”, “flg22-PTI”, and “elf18-PTI”. The formula for the  
597 fixed effects was “~ genotype/treatment -1”. The random effects for the data sets were “~  
598 1|replicate/flat/pot”. The interaction coefficients of the linear mixed-effect model were used  
599 to test whether each gene is significant. For example, to test the significance of the *J* gene, the estimate  
600 differences,  $JEPS - EPS$ ,  $JEP - EP$ ,  $JPS - PS$ ,  $JES - ES$ ,  $JE - E$ ,  $JP - P$ ,  $JS - S$ , and  $J - jeps$  were subjected to *t*-  
601 tests using the associated standard errors calculated from the variance/covariance matrix and the  
602 residual degree of freedom. If none of the *p*-values from the *t*-tests were smaller than 0.05, the gene  
603 was designated insignificant and omitted from the following averaging model analysis. To avoid overly  
604 stringent tests, multiple tests correction was not used for selection of significant genes. Only the *J* gene  
605 in “elf18-PTI” was found insignificant. In this case, the data were bundled by ignoring the *J* gene. For  
606 example, the *JEPS* data were considered as part of the *EPS* data.

607

608 Second, the averaging model using the significant genes was fit. The 4-gene system equivalent matrix of  
609 the 3-gene system matrix in Fig. 2c or the 3-gene system matrix was used (the matrices are provided in  
610 an R workspace file in Supplemental Dataset 2). The rows were replicated according to the genotypes of  
611 the observations (the design matrix for the averaging model coefficients, denoted as “*m*”). Using the

612 design matrix  $m$ ., the fixed effects were, “ $\sim m. -1 + genotype$ ” and the random effects were, “ $\sim$   
613  $1|replicate/flat/pot$ ” in the lme function. The averaging model coefficient estimates, their  
614 standard errors, and the  $p$ -values were extracted from the coefficient table of the lme model. The  
615 estimates, the standard errors, and the residual degree of freedom of the lme model were used to  
616 calculate the 95% confidence intervals. The  $p$ -values were subjected to the Holm multiple tests  
617 correction. The R script used to generate Fig. 7 from the raw bacterial count data sets is provided as  
618 Supplemental Dataset 3.

619

620

621

## 622 **ACKNOWLEDGEMENTS**

623 I thank Dave Mackey and Alex Turo for exposing me to their unpublished data from a 7-gene system,  
624 which led me to realization of the averaging model. I also thank Yaniv Brandvain, Ruth Shaw, Kenichi  
625 Tsuda, and Linda Jeanguenin for critical reading of the manuscript and Jane Glazebrook for editing. This  
626 work was supported by grants from National Science Foundation (MCB-1518058 and IOS-1645460).

627

628

629

## 630 **REFERENCES**

- 631 1. Hillmer RA, Tsuda K, Rallapalli G, Asai S, Truman W, Papke MD, et al. The highly buffered  
632 Arabidopsis immune signaling network conceals the functions of its components. *PLoS Genet.*  
633 2017;13(5):e1006639. Epub 20170504. doi: 10.1371/journal.pgen.1006639. PubMed PMID: 28472137;  
634 PubMed Central PMCID: PMC5417422.
- 635 2. Tsuda K, Sato M, Stoddard T, Glazebrook J, Katagiri F. Network properties of robust immunity in  
636 plants. *PLoS Genet.* 2009;5(12):e1000772. PubMed PMID: 20011122.
- 637 3. Celaj A, Gebbia M, Musa L, Cote AG, Snider J, Wong V, et al. Highly Combinatorial Genetic  
638 Interaction Analysis Reveals a Multi-Drug Transporter Influence Network. *Cell Syst.* 2020;10(1):25-  
639 38.e10. Epub 20191023. doi: 10.1016/j.cels.2019.09.009. PubMed PMID: 31668799; PubMed Central  
640 PMCID: PMC6989212.
- 641 4. Kuzmin E, VanderSluis B, Nguyen Ba AN, Wang W, Koch EN, Usaj M, et al. Exploring whole-  
642 genome duplicate gene retention with complex genetic interaction analysis. *Science.* 2020;368(6498).  
643 doi: 10.1126/science.aaz5667. PubMed PMID: 32586993; PubMed Central PMCID: PMC7539174.
- 644 5. Katagiri F. A global view of defense gene expression regulation - a highly interconnected  
645 signaling network. *Current Opinion in Plant Biology.* 2004;7(5):506-11. doi: 10.1016/j.pbi.2004.07.013.  
646 PubMed PMID: WOS:000224015800004.
- 647 6. Katagiri F. Review: Plant immune signaling from a network perspective. *Plant Sci.* 2018;276:14-  
648 21. Epub 20180731. doi: 10.1016/j.plantsci.2018.07.013. PubMed PMID: 30348311.
- 649 7. Katagiri F. Network Reconstitution for Quantitative Subnetwork Interaction Analysis. *Methods*  
650 *Mol Biol.* 2017;1578:223-31. doi: 10.1007/978-1-4939-6859-6\_18. PubMed PMID: 28220428.
- 651 8. Jones JDG, Dangl JL. The plant immune system. *Nature.* 2006;444(7117):323-9. doi:  
652 10.1038/nature05286. PubMed PMID: WOS:000242018300039.
- 653 9. Chisholm ST, Coaker G, Day B, Staskawicz BJ. Host-microbe interactions: Shaping the evolution  
654 of the plant immune response. *Cell.* 2006;124(4):803-14. doi: 10.1016/j.cell.2006.02.008. PubMed PMID:  
655 WOS:000237240900022.

- 656 10. Mindrinos M, Katagiri F, Yu GL, Ausubel FM. The *A. thaliana* disease resistance gene RPS2  
657 encodes a protein containing a nucleotide-binding site and leucine-rich repeats. *Cell*. 1994;78(6):1089-  
658 99. PubMed PMID: 7923358.
- 659 11. Bent AF, Kunkel BN, Dahlbeck D, Brown KL, Schmidt R, Giraudat J, et al. RPS2 OF ARABIDOPSIS-  
660 THALIANA - A LEUCINE-RICH REPEAT CLASS OF PLANT-DISEASE RESISTANCE GENES. *Science*.  
661 1994;265(5180):1856-60. doi: 10.1126/science.8091210. PubMed PMID: WOS:A1994PH25800030.
- 662 12. Grant MR, Godiard L, Straube E, Ashfield T, Lewald J, Sattler A, et al. STRUCTURE OF THE  
663 ARABIDOPSIS RPM1 GENE ENABLING DUAL-SPECIFICITY DISEASE RESISTANCE. *Science*.  
664 1995;269(5225):843-6. doi: 10.1126/science.7638602. PubMed PMID: WOS:A1995RN65000046.
- 665 13. Zipfel C, Robatzek S, Navarro L, Oakeley EJ, Jones JDG, Felix G, et al. Bacterial disease resistance  
666 in Arabidopsis through flagellin perception. *Nature*. 2004;428(6984):764-7. doi: 10.1038/nature02485.  
667 PubMed PMID: WOS:000220823800043.
- 668 14. Gómez-Gómez L, Felix G, Boller T. A single locus determines sensitivity to bacterial flagellin in  
669 Arabidopsis thaliana. *Plant J*. 1999;18(3):277-84. doi: 10.1046/j.1365-313x.1999.00451.x. PubMed PMID:  
670 10377993.
- 671 15. Zipfel C, Kunze G, Chinchilla D, Caniard A, Jones JDG, Boller T, et al. Perception of the bacterial  
672 PAMP EF-Tu by the receptor EFR restricts Agrobacterium-mediated transformation. *Cell*.  
673 2006;125(4):749-60. doi: 10.1016/j.cell.2006.03.037. PubMed PMID: WOS:000237886000019.
- 674 16. Hatsugai N, Igarashi D, Mase K, Lu Y, Tsuda Y, Chakravarthy S, et al. A plant effector-triggered  
675 immunity signaling sector is inhibited by pattern-triggered immunity. *EMBO J*. 2017;36(18):2758-69.  
676 Epub 20170815. doi: 10.15252/embj.201796529. PubMed PMID: 28811287; PubMed Central PMCID:  
677 PMC5599791.
- 678 17. Pieterse CMJ, Van der Does D, Zamioudis C, Leon-Reyes A, Van Wees SCM. Hormonal  
679 Modulation of Plant Immunity. *Annual Review of Cell and Developmental Biology*, Vol 28. 2012;28:489-  
680 521. doi: 10.1146/annurev-cellbio-092910-154055. PubMed PMID: WOS:000310224200020.
- 681 18. Pinheiro J, Bates D, DebRoy S, Sarkar D, R Core Team. *nlme: Linear and Nonlinear Mixed Effects*  
682 *Models*. 2021.

683

684

685

## 686 **FIGURE LEGENDS**

687

688 Fig. 1. A simple network behavior can be well described by the wild-type allele effects of a multi-gene  
689 system but not by the mutant allele effects. (a) A mechanistic model of a network containing 3 nodes  
690 that can be mutationally manipulated (a 3-gene system). The network consists of 6 nodes, among which  
691 nA, nB, and nC are mutationally manipulable and nX, nY, and nZ are not. The output of each node is  
692 given either as a value or an equation. The output of nZ is the quantitative phenotype of the system. (b)  
693 The phenotype values of all 8 combinatorial genotypes. (c) The values for the mutant allele effects and  
694 interactions. (d) The values for the wild-type allele effects and interactions.

695

696 Fig. 2. Matrices for the linear equations to obtain model coefficients from the genotype values in a 3-  
697 gene system for (a) additive, (b) NR, and (c) averaging models. The rows are genotypes and the columns  
698 are model variables. “:” and “;” indicate the additive and averaging interactions, respectively.

699

700 Fig. 3. Non-linearity in a system violates the distributive law. (a) a 3-gene system, in which signals from  
701 nA and nB feed into nC. The output of nC is defined as  $f_1(nA + nB)$ . (b) When  $f_1(x) = \frac{10}{1+\frac{7}{x}}$ , the input-  
702 output relationships at nC are shown. If the input is nA, the output is expressed as A:C in the additive  
703 model. This plot clearly shows that  $(A + B):C \neq A:C + B:C$  (Y-axis values in orange and green, respectively),  
704 a violation of the distributive law. (the y-axis values in orange and green)

705  
706 Fig. 4. Distributions of the gene effects and interaction values when the phenotype values were  
707 randomly sampled from a uniform distribution with (a) additive, (b) NR, and (c) averaging models. Each  
708 order of interactions is color-coded separately, and the color coding is shown in the bottom of (a). Note  
709 that the scales in the y-axes are very different in (a) compared to (b) and (c).

710  
711 Fig. 5. The coefficient estimates for the contribution to immunity using the data from Tsuda et al. in (a)  
712 additive, (b) NR, and (c) averaging models. The 95% confidence interval is shown as a horizontal bar,  
713 with the mean as a point. Different levels of model reduction (omitting higher order interactions from  
714 the model) are color-coded according to the color code in (a). Different shades of gray background are  
715 used to show different orders of interactions. “:” and “;” indicate additive and averaging interactions,  
716 respectively.

717  
718 Fig. 6. Interpretations of interactions in (a-c) additive and (d-f) averaging models. (a, d) Two-gene  
719 interactions when both 1-gene effects A and B are positive. Two different cases (cases 1 and 2) of the AB  
720 phenotype values are used. (b, e) Two-gene interactions when 1-gene effects have opposite signs. (c, f)  
721 Three-gene interactions. “:” and “;” indicate additive and averaging interactions, respectively.

722  
723 Fig. 7. The coefficient estimates for the contribution to immunity from averaging model analysis of the  
724 data in Tsuda et al. (a) AvrRpt2-ETI, (b) AvrRpm1-ETI, (c) flg22-PTI, and (d) elf18-PTI. The 95% confidence  
725 interval is shown as a horizontal bar, with the mean as a point. The Holm-corrected  $p$ -values are shown  
726 in the left part of each plot: red,  $p < 0.05$ ; blue,  $p \geq 0.05$ . The dataset used for AvrRpt2-ETI in Fig. 7a is  
727 the same as that in used in Fig. 5, and Fig. 7a is the same as the full model (black lines) in Fig. 5c. “:” and  
728 “;” indicate additive and averaging interactions, respectively.

729  
730  
731

## 732 SUPPLEMENTAL DATASETS

733 Supplemental Dataset 1. A .zip file containing four bacterial count data files (tab-delimited text) for  
734 “AvrRpt2\_ETI”, “AvrRpm1\_ETI”, “flg22\_PTI”, and “elf18\_PTI”. Each has columns of genotype, treatment,  
735 replicate, flat, pot, and colony. The colony column has log<sub>10</sub>-transformed colony counts (colony forming  
736 unit/cm<sup>2</sup>). Although the data were originally reported in [2], these raw data were not published.

737

738 Supplemental Dataset 2. A .RData file (R workspace file) containing a list object, “ave.model.mats”,  
739 which contains the matrices for the averaging model for 2- to 7-gene systems (equivalents of matrix in  
740 Fig. 2c for different order gene systems).  
741  
742 Supplemental Dataset 3. An R script file (.r file), which is used to generate Fig. 7 from the data sets in  
743 Supplemental Dataset 1. It includes algorithms for selecting significant genes for the analysis and the  
744 averaging model. In the script, the object of a 3-gene or 4-gene matrix included in Supplemental Dataset  
745 2 is called “rec.mx”, which is generated by a function, “make.rec.mx”.

**Fig. 1**

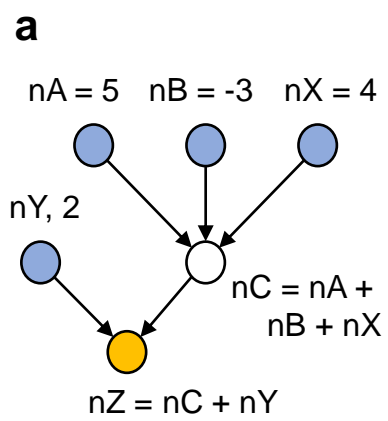

**b**

| Genotype   | Z value |
|------------|---------|
| <i>ABC</i> | 8       |
| <i>aBC</i> | 3       |
| <i>AbC</i> | 11      |
| <i>ABc</i> | 2       |
| <i>abC</i> | 6       |
| <i>aBc</i> | 2       |
| <i>Abc</i> | 2       |
| <i>abc</i> | 2       |

**c**

| Effect or Interaction  | ANOVA-lof |
|------------------------|-----------|
| <i>ABC</i> (intercept) | 8         |
| a                      | -5        |
| b                      | 3         |
| c                      | -6        |
| a:b                    | 0         |
| a:c                    | 5         |
| b:c                    | -3        |
| a:b:c                  | 0         |

**d**

| Effect or Interaction  | ANOVA-GOF |
|------------------------|-----------|
| <i>abc</i> (intercept) | 2         |
| A                      | 0         |
| B                      | 0         |
| C                      | 4         |
| A:B                    | 0         |
| A:C                    | 5         |
| B:C                    | -3        |
| A:B:C                  | 0         |





**Fig. 3**

**a**

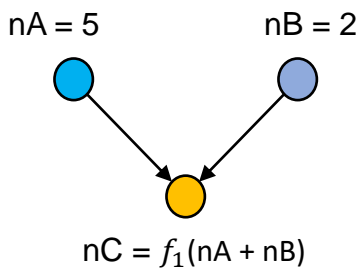

**b**

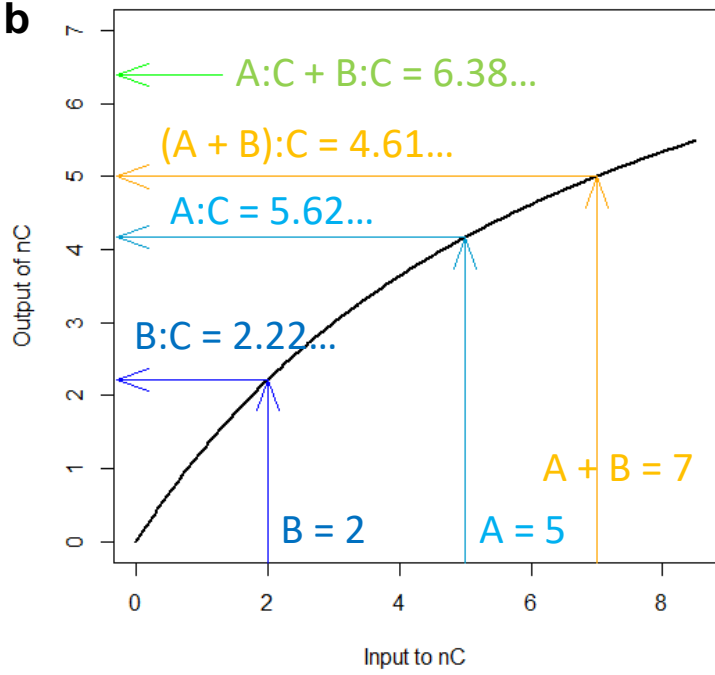

**Fig. 4**

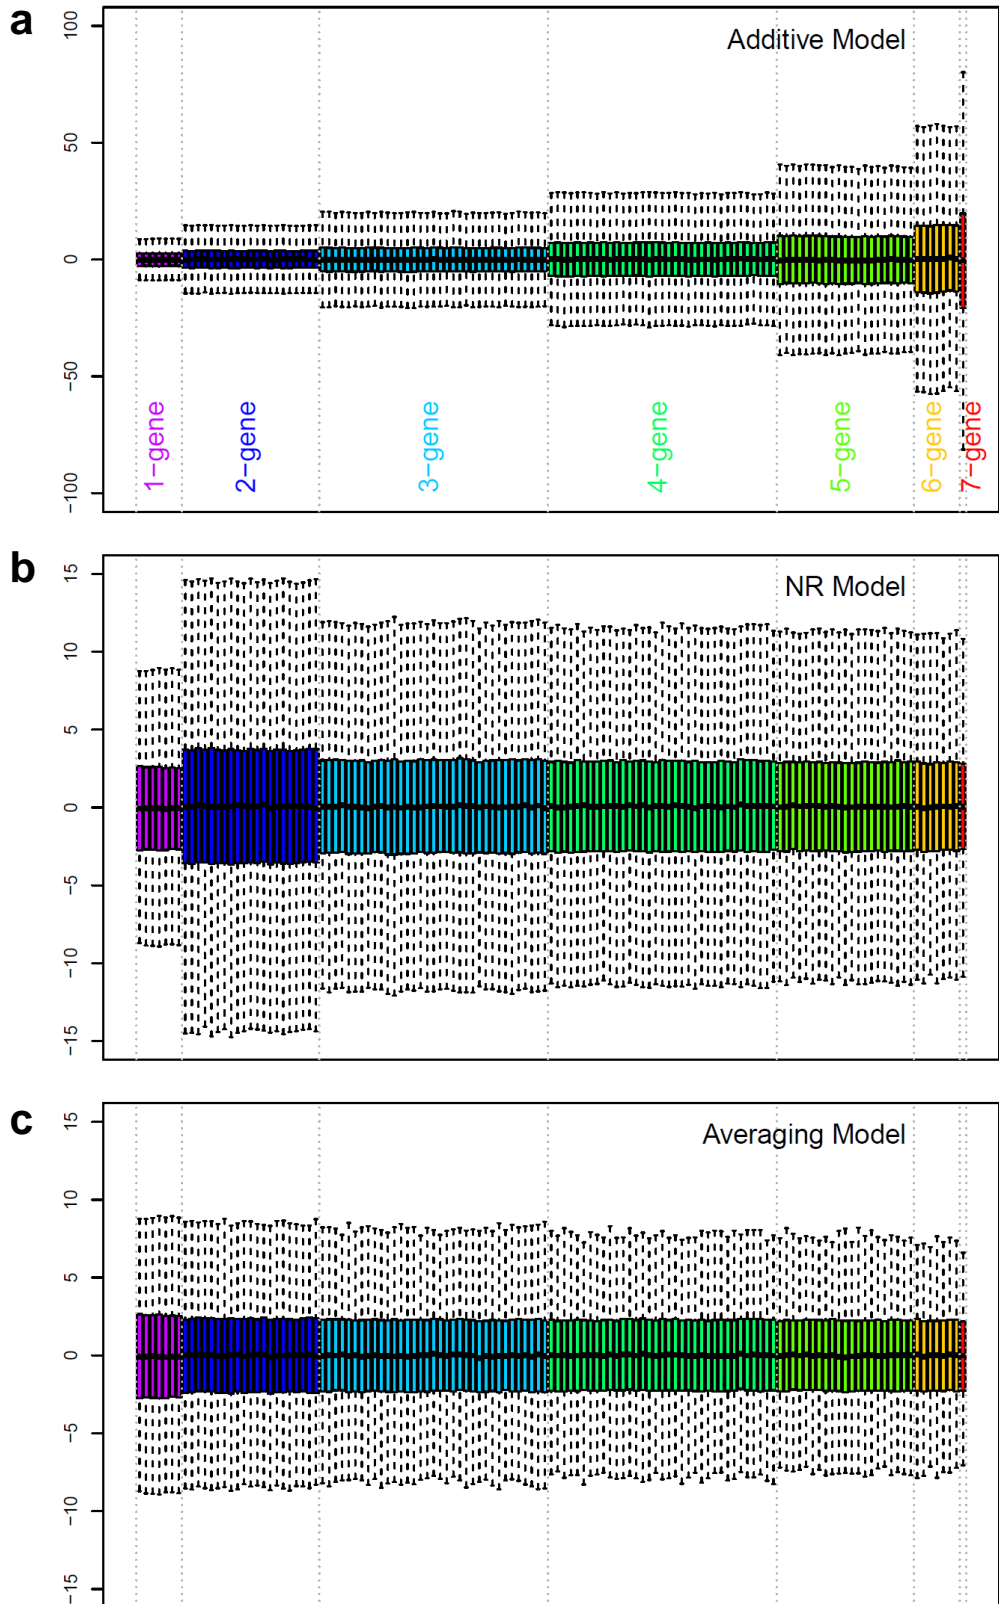

**Fig. 5**

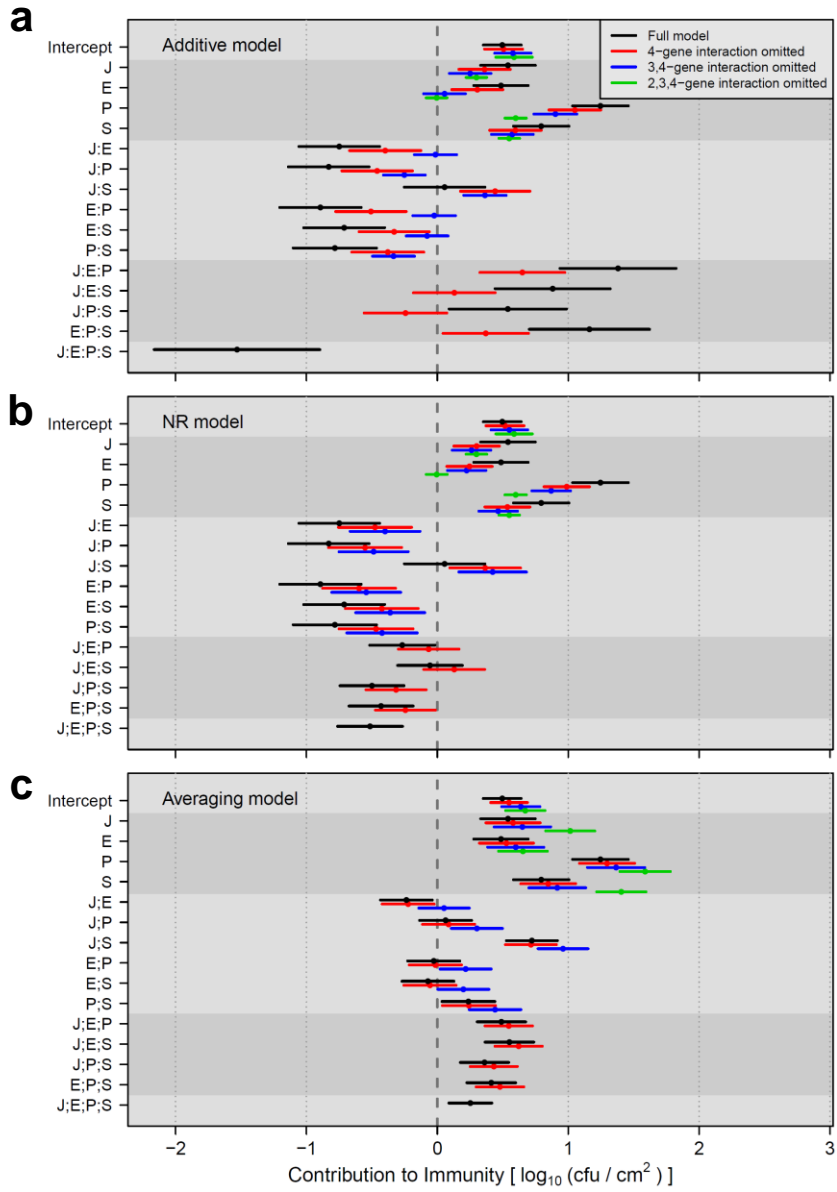

**Fig. 6**

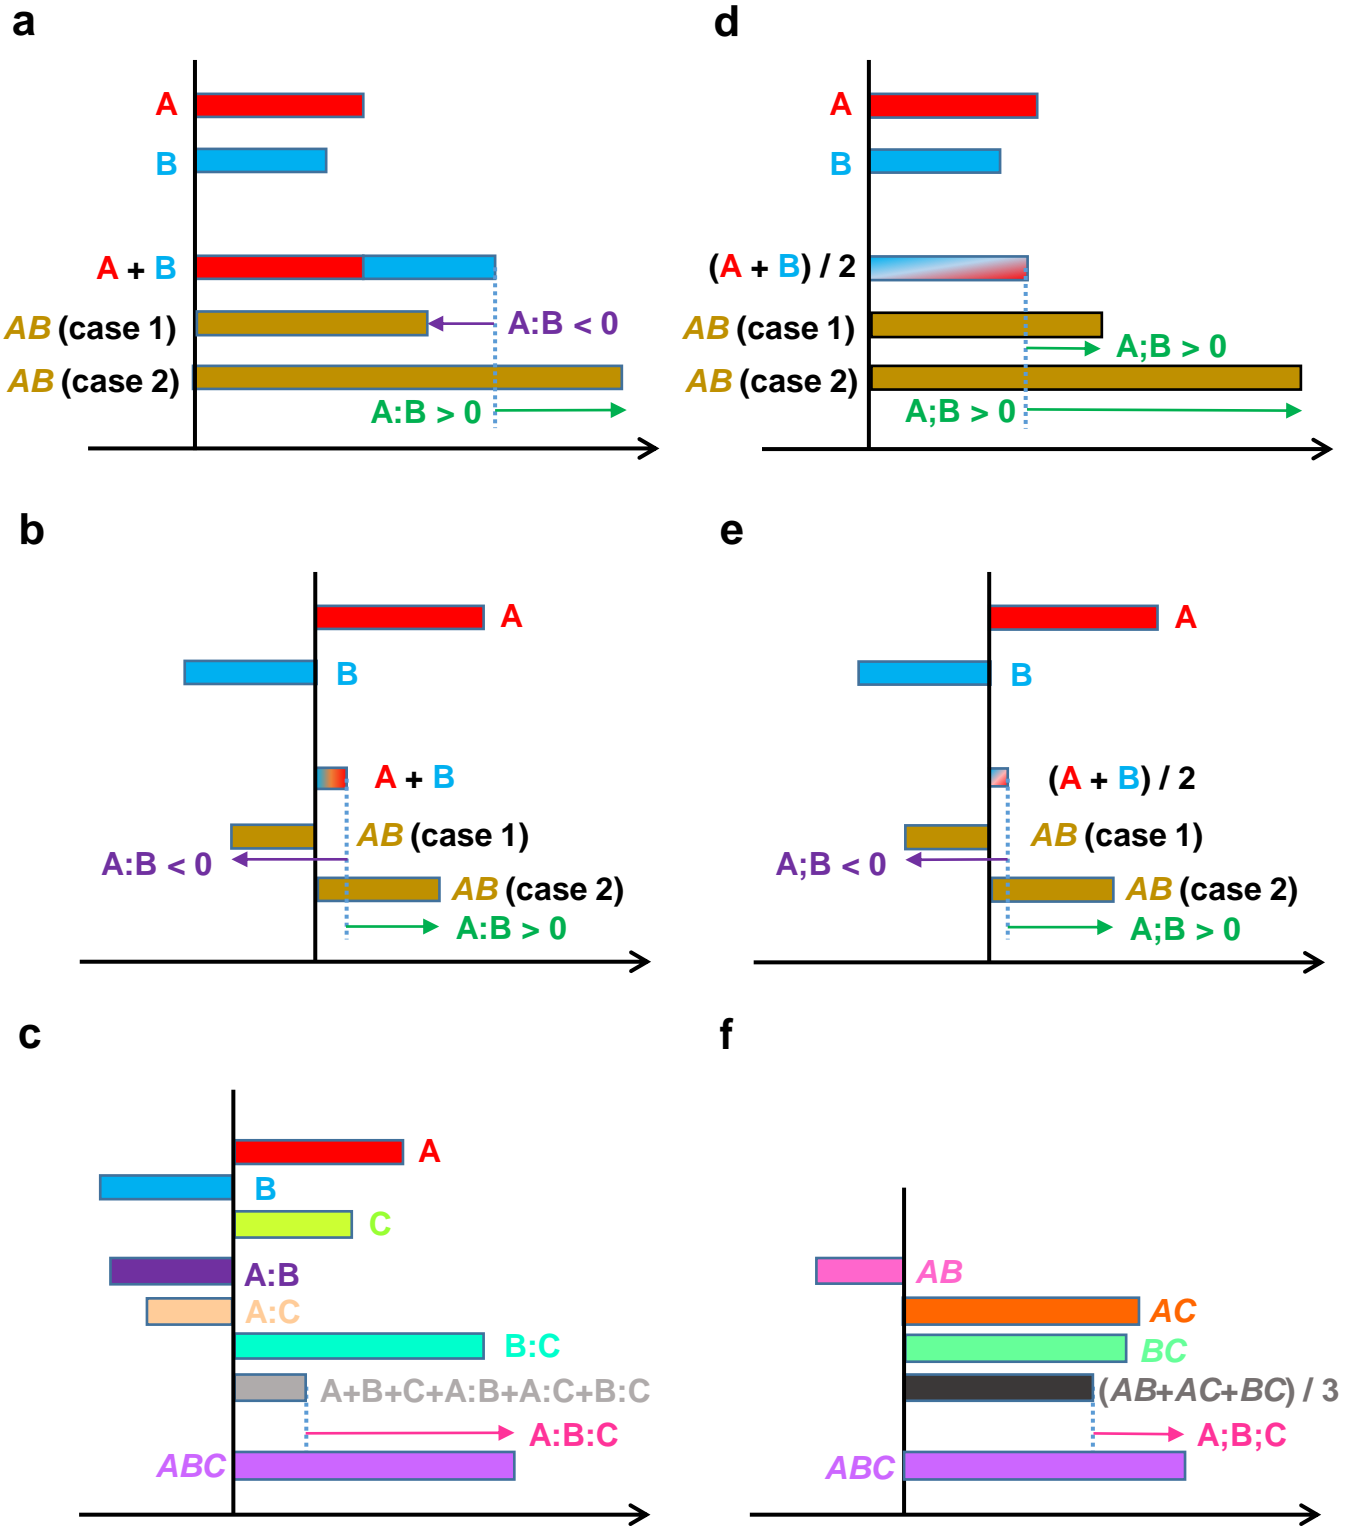

**Fig. 7**

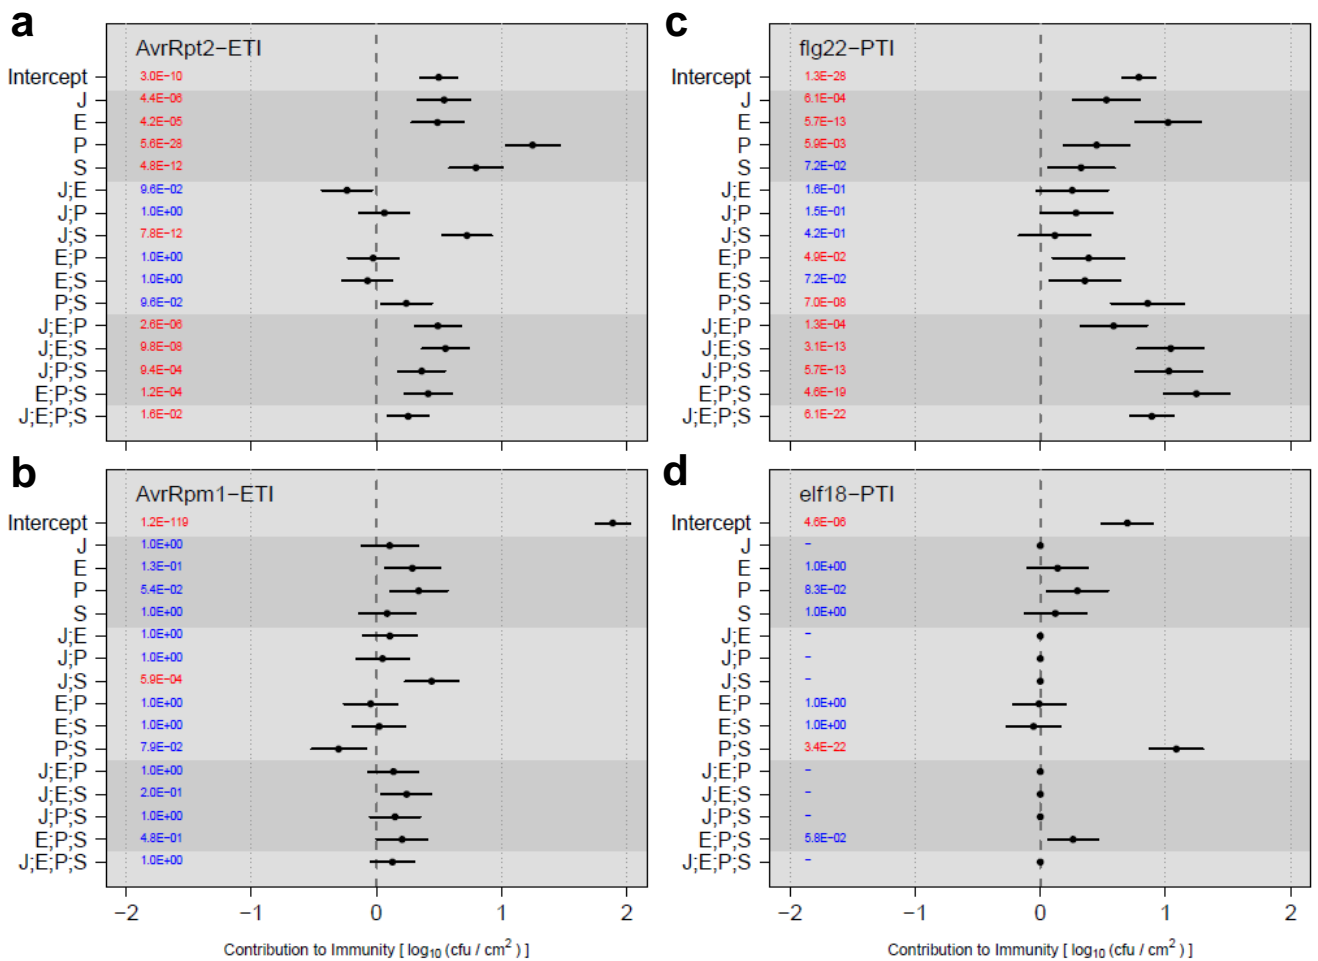

Source: https://www.biorxiv.org/content/10.1101/2022.02.21.481332v1.full.pdf
